# Supplementary material for: The Effect of Background Colors of Learning Materials on Memory:evidence from Chinese Characters
Source: Research Square preprint supplement (doi:10.21203/rs.3.rs-5266192/v1), 2024-12-16

Table 1. Descriptive statistical analysis of Chinese character memory performance under different background color conditions.


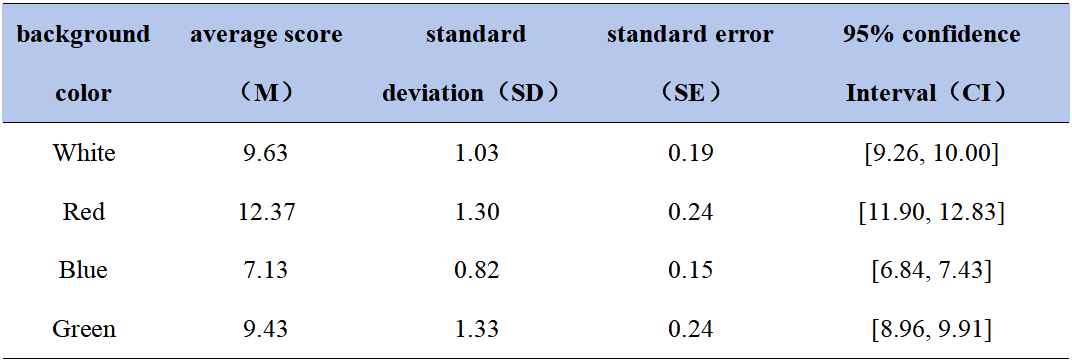

Supplement: Supplementary file 1 [file 397cd872fd0f293003a05637.docx]
